# Supplementary material for: Prevalence and Severity of Pelvic Floor Disorders during Pregnancy: Does the Trimester Make a Difference?
Source: MDPI journal article supplement (doi:10.3390/healthcare11081096), 2023-04-11
Supplement: s1 [file s1]

## Beckenboden-Fragebogen für Schwangere und Frauen nach Geburt

### MODUL RISIKOFAKTOREN

### RISIKO

|                                                                                                                  |                   |                                               |                                         |                               |
|------------------------------------------------------------------------------------------------------------------|-------------------|-----------------------------------------------|-----------------------------------------|-------------------------------|
| Größe<br>□□□ cm                                                                                                  | Gewicht<br>□□□ kg | Gewicht vor Schwangerschaft<br>Für BMI □□□ kg | BMI □□,□                                | <input type="checkbox"/> > 25 |
| Alter                                                                                                            |                   |                                               | □□ Jahre                                | <input type="checkbox"/> > 35 |
| Gibt es in Ihrer Familie blutsverwandte Frauen mit Harninkontinenz, Stuhlinkontinenz, Absinken der Beckenorgane? |                   | <input type="checkbox"/> nein                 | <input type="checkbox"/> weiß nicht     | <input type="checkbox"/> ja   |
| Rauchen Sie?                                                                                                     |                   | <input type="checkbox"/> nein                 | <input type="checkbox"/> habe aufgehört | <input type="checkbox"/> ja   |
| Können Sie Ihren Beckenboden gezielt anspannen?                                                                  |                   | <input type="checkbox"/> ja                   | <input type="checkbox"/> weiß nicht     | <input type="checkbox"/> nein |

### Blasenfunktion

|                                                                                                                                 |                  |                                           |                                       |                      |
|---------------------------------------------------------------------------------------------------------------------------------|------------------|-------------------------------------------|---------------------------------------|----------------------|
| 1. Wie häufig lassen Sie tagsüber Wasser?<br><small>Pollakisurie</small>                                                        | 0 alle 3 Stunden | 1 alle 2 Stunden                          | 2 einmal pro Stunde                   | 3 häufiger           |
| 2. Wie häufig erwachen Sie nachts, weil Sie Urin lassen müssen?<br><small>Nykturie</small>                                      | 0 0 – 1x         | 1 2x                                      | 2 3x                                  | 4 mehr als 3x        |
| 3. Verlieren Sie Urin im Schlaf?<br><small>Enuresis nocturna</small>                                                            | 0 niemals        | 1 manchmal - weniger als einmal pro Woche | 2 häufig – einmal oder mehr pro Woche | 3 meistens - täglich |
| 4. Ist der Harndrang so stark, dass Sie sofort zur Toilette eilen müssen?<br><small>Imp Harndrang</small>                       | 0 niemals        | 1 manchmal - weniger als einmal pro Woche | 2 häufig – einmal oder mehr pro Woche | 3 meistens - täglich |
| 5. Verlieren Sie bei plötzlichem sehr starken Harndrang Urin, bevor Sie die Toilette erreicht haben?<br><small>Drangink</small> | 0 niemals        | 1 manchmal - weniger als einmal pro Woche | 2 häufig – einmal oder mehr pro Woche | 3 meistens - täglich |
| 6. Verlieren Sie Urin beim Husten, Niesen, Lachen, Heben oder Sport?<br><small>Belastungsink</small>                            | 0 niemals        | 1 manchmal - weniger als einmal pro Woche | 2 häufig – einmal oder mehr pro Woche | 3 meistens - täglich |
| 7. Ist Ihr Harnstrahl schwach, verlangsamt oder verlängert?<br><small>Harnstrahl</small>                                        | 0 niemals        | 1 manchmal - weniger als einmal pro Woche | 2 häufig – einmal oder mehr pro Woche | 3 meistens - täglich |
| 8. Haben Sie das Gefühl richtig einzuschätzen, wie voll Ihre Blase ist?<br><small>Aff Vesica</small>                            | 0 ja - immer     | 1 meistens                                | 2 manchmal                            | 3 nein - niemals     |
| 9. Haben Sie das Gefühl, Ihre Blase nicht vollständig entleeren zu können?<br><small>Restharn</small>                           | 0 niemals        | 1 manchmal - weniger als einmal pro Woche | 2 häufig – einmal oder mehr pro Woche | 3 meistens - täglich |
| 10. Müssen Sie pressen, um Urin lassen zu können?<br><small>Pressen</small>                                                     | 0 niemals        | 1 manchmal - weniger als einmal pro Woche | 2 häufig – einmal oder mehr pro Woche | 3 meistens - täglich |
| 11. Tragen Sie Slipeinlagen oder Binden wegen eines Urinverlustes?<br><small>Vorlagen</small>                                   | 0 niemals        | 1 manchmal - nur als Prophylaxe           | 2 häufig – beim Sport / bei Erkältung | 3 meistens - täglich |

|                                                                                                                      |                                                                  |                                           |                                       |                      |        |
|----------------------------------------------------------------------------------------------------------------------|------------------------------------------------------------------|-------------------------------------------|---------------------------------------|----------------------|--------|
| 12. Schränken Sie Ihre Trinkmenge ein, um Urinverlust zu vermeiden?<br><small>Trinkverhalten</small>                 | 0 niemals                                                        | 1 manchmal - weniger als einmal pro Woche | 2 häufig – einmal oder mehr pro Woche | 3 meistens - täglich |        |
| 13. Haben Sie ein Brennen, Ziehen oder Schmerzen beim Wasserlassen?<br><small>Dysurie</small>                        | 0 niemals                                                        | 1 manchmal - weniger als einmal pro Woche | 2 häufig – einmal oder mehr pro Woche | 3 meistens - täglich |        |
| 14. Wie häufig haben Sie Harnwegsinfekte?<br><small>HWI</small>                                                      | 0 selten oder nie                                                | 1 1-3x pro Jahr                           | 2 4-12x pro Jahr                      | 3 1 oder mehr/Monat  |        |
| 15. Beeinträchtigt der Urinverlust Ihr tägliches Leben? (z.B. Sport, Beruf, Einkauf, Ausgehen)<br><small>QoL</small> | <input type="checkbox"/> nicht zutreffend<br>habe keine Symptome | 0 überhaupt nicht                         | 1 ein wenig                           | 2 ziemlich           | 3 sehr |
| 16. Wie sehr stören Sie Ihre Blasensymptome?<br><small>Leidensdruck Blase</small>                                    | <input type="checkbox"/> nicht zutreffend<br>habe keine Symptome | 0 überhaupt nicht                         | 1 ein wenig                           | 2 ziemlich           | 3 sehr |

## Darmfunktion

|                                                                                                                            |                                                                 |                                           |                                       |                            |        |
|----------------------------------------------------------------------------------------------------------------------------|-----------------------------------------------------------------|-------------------------------------------|---------------------------------------|----------------------------|--------|
| 1. Wie häufig haben Sie Stuhlgang?<br><small>Frequenz</small>                                                              | 0 alle 3 Tage bis täglich                                       | 1 mehr als 1x täglich                     | 1 alle 3 Tage oder seltener           | 2 weniger als einmal/Woche |        |
| 2. Wie ist die Konsistenz Ihres Stuhls normalerweise beschaffen?<br><small>Konsistenz</small>                              | 0 weich oder geformt                                            | 1 verschieden                             | 1 sehr hart                           | 2 dünn/breig               |        |
| 3. Pressen Sie beim Stuhlgang sehr stark?<br><small>Pressen</small>                                                        | 0 niemals                                                       | 1 manchmal - weniger als einmal pro Woche | 2 häufig – einmal oder mehr pro Woche | 3 meistens - täglich       |        |
| 4. Leiden Sie unter Verstopfungen?<br><small>Obstipation</small>                                                           | 0 niemals                                                       | 1 manchmal - weniger als einmal pro Woche | 2 häufig – einmal oder mehr pro Woche | 3 meistens - täglich       |        |
| 5. Entweichen Ihnen Winde oder Blähungen, ohne dass Sie sie zurückhalten können?<br><small>Flatusinkontinenz</small>       | 0 niemals                                                       | 1 manchmal - weniger als einmal pro Woche | 2 häufig – einmal oder mehr pro Woche | 3 meistens - täglich       |        |
| 6. Bekommen Sie Stuhldrang, den Sie nicht zurückdrängen können?<br><small>Imp Stuhldrang</small>                           | 0 niemals                                                       | 1 manchmal - weniger als einmal pro Woche | 2 häufig – einmal oder mehr pro Woche | 3 meistens - täglich       |        |
| 7. Finden Sie auf Ihrer Wäsche oder auf Vorlagen Verfärbungen durch Stuhl?<br><small>Stuhlschmierer</small>                | 0 niemals                                                       | 1 manchmal - weniger als einmal pro Woche | 2 häufig – einmal oder mehr pro Woche | 3 meistens - täglich       |        |
| 8. Verlieren Sie oder entweicht Ihnen versehentlich Stuhl?<br><small>Stuhlink</small>                                      | 0 niemals                                                       | 1 manchmal - weniger als einmal pro Woche | 2 häufig – einmal oder mehr pro Woche | 3 meistens - täglich       |        |
| 9. Haben Sie das Gefühl, den Darm nicht vollständig entleeren zu können?<br><small>Entleerungsstörungen</small>            | 0 niemals                                                       | 1 manchmal - weniger als einmal pro Woche | 2 häufig – einmal oder mehr pro Woche | 3 meistens - täglich       |        |
| 10. Beeinträchtigen die Symptome Ihr tägliches Leben? (Tagesplanung, Sport, Beruf, Einkauf, Ausgehen)<br><small>LQ</small> | <input type="checkbox"/> nicht zutreffend – habe keine Symptome | 0 überhaupt nicht                         | 1 ein wenig                           | 2 ziemlich                 | 3 sehr |
| 11. Wie sehr stören Sie Ihre Darmsymptome?<br><small>Leidensdruck Darm</small>                                             | <input type="checkbox"/> nicht zutreffend – habe keine Symptome | 0 überhaupt nicht                         | 1 ein wenig                           | 2 ziemlich                 | 3 sehr |

## Senkung

|                                                                                                                                               |                                                                 |                                           |                                       |                      |        |
|-----------------------------------------------------------------------------------------------------------------------------------------------|-----------------------------------------------------------------|-------------------------------------------|---------------------------------------|----------------------|--------|
| 1. Haben Sie ein Fremdkörpergefühl in der Scheide?<br><small>Fremdk</small>                                                                   | 0 niemals                                                       | 1 manchmal - weniger als einmal pro Woche | 2 häufig – einmal oder mehr pro Woche | 3 meistens – täglich |        |
| 2. Haben Sie das Gefühl, dass sich Ihre Scheide oder Gebärmutter abgesenkt haben?<br><small>DeszGefühl</small>                                | 0 niemals                                                       | 1 manchmal - weniger als einmal pro Woche | 2 häufig – einmal oder mehr pro Woche | 3 meistens – täglich |        |
| 3. Haben Sie das Gefühl, dass sich beim Heben, Gehen oder Rennen Ihre Scheide oder Ihre Gebärmutter absenken?<br><small>DeszBelastung</small> | 0 überhaupt nicht                                               | 1 ein wenig                               | 2 ziemlich                            | 3 sehr               |        |
| 4. Beeinträchtigen diese Symptome Ihr tägliches Leben? (z.B. Sport, Beruf, Einkauf, Ausgehen)<br><small>LQ</small>                            | <input type="checkbox"/> nicht zutreffend – habe keine Symptome | 0 überhaupt nicht                         | 1 ein wenig                           | 2 ziemlich           | 3 sehr |
| 5. Wie sehr stört Sie Ihre Senkung?<br><small>LD Desz</small>                                                                                 | <input type="checkbox"/> nicht zutreffend – habe keine Symptome | 0 überhaupt nicht                         | 1 ein wenig                           | 2 ziemlich           | 3 sehr |

## Sexualität

|                                                                                                 |                                                                 |                                                       |                                                             |                                                             |          |
|-------------------------------------------------------------------------------------------------|-----------------------------------------------------------------|-------------------------------------------------------|-------------------------------------------------------------|-------------------------------------------------------------|----------|
| Sind Sie sexuell aktiv?<br><small>Sex Aktiv</small>                                             | <input type="checkbox"/> gar nicht                              | <input type="checkbox"/> selten                       | <input type="checkbox"/> regelmäßig                         |                                                             |          |
| Falls Sie keinen Verkehr haben, warum nicht?<br><small>Abstinent weil</small>                   | <input type="checkbox"/> kein Partner                           | <input type="checkbox"/> Partner hat Problem/impotent | <input type="checkbox"/> empfinde keine Erregung/keine Lust | <input type="checkbox"/> Sex ist mir unangenehm, weil ..... |          |
| Haben Sie sexuelle Erfahrungen gemacht, die Sie sehr belasten?<br><small>SexTrauma</small>      | <input type="checkbox"/> nein                                   |                                                       |                                                             | <input type="checkbox"/> ja                                 |          |
| 1. Wird Ihre Scheide während des Verkehrs ausreichend feucht?<br><small>Lubrikation</small>     | 0 ja                                                            |                                                       |                                                             | 1 nein                                                      |          |
| 2. Wie ist das Gefühl in der Scheide während des Verkehrs?<br><small>AfferenzVag</small>        | 0 fühle viel                                                    | 1 fühle wenig                                         | 2 fühle nichts                                              | 3 habe Schmerzen                                            |          |
| 3. Denken Sie, dass Ihre Scheide zu schlaff oder weit ist?<br><small>VagWeite</small>           | 0 nein - niemals                                                | 1 manchmal                                            | 2 häufig                                                    | 3 immer                                                     |          |
| 4. Denken Sie, dass Ihre Scheide zu eng oder straff ist?<br><small>Vaginismus</small>           | 0 nein – niemals                                                | 1 manchmal                                            | 2 häufig                                                    | 3 immer                                                     |          |
| 5. Haben Sie Schmerzen während des Verkehrs?<br><small>Dyspareunie</small>                      | 0 nein – niemals                                                | 1 manchmal                                            | 2 häufig                                                    | 3 immer                                                     |          |
| 6. Falls Sie Schmerzen während des Verkehrs haben, wo sind die Schmerzen?                       | 1 am Scheideneingang                                            |                                                       | 1 tief innerlich / im Becken                                |                                                             | 2 beides |
| 7. Verlieren Sie unbeabsichtigt Urin oder Stuhl beim Sex?<br><small>Koitale Inkontinenz</small> | 0 nein – niemals                                                | 1 manchmal                                            | 2 häufig                                                    | 3 immer                                                     |          |
| 8. Beeinträchtigen diese Symptome Ihre Sexualität?<br><small>LQ</small>                         | <input type="checkbox"/> nicht zutreffend – habe keine Symptome | 0 überhaupt nicht                                     | 1 ein wenig                                                 | 2 ziemlich                                                  | 3 sehr   |
| 9. Wie sehr stören Sie diese Symptome?<br><small>Leidensdruck Sex</small>                       | <input type="checkbox"/> nicht zutreffend – habe keine Symptome | 0 überhaupt nicht                                     | 1 ein wenig                                                 | 2 ziemlich                                                  | 3 sehr   |

**Score** (Hier bitte nichts eintragen)

|                                                             |              |                                                        |   |        |
|-------------------------------------------------------------|--------------|--------------------------------------------------------|---|--------|
| <b>Blasenfunktion</b>                                       | Fragen 1- 14 | Score <input type="text"/> <input type="text"/> / 44 = | + | x 10 = |
| <b>Darmfunktion</b>                                         | Fragen 1- 9  | Score <input type="text"/> <input type="text"/> / 27 = | + | x 10 = |
| <b>Senkung</b>                                              | Fragen 1- 3  | Score <input type="text"/> <input type="text"/> / 11 = | + | x 10 = |
| <b>Sexualität</b>                                           | Fragen 1- 7  | Score <input type="text"/> <input type="text"/> / 19 = | + | x 10 = |
| <b>Blasenscore + Darmscore + Senkungsscore + Sexscore =</b> |              |                                                        |   |        |

**Postpartales Modul**

**Risiko**

|                                                                                                        |                                                                                       |                                                                   |                                    |                               |
|--------------------------------------------------------------------------------------------------------|---------------------------------------------------------------------------------------|-------------------------------------------------------------------|------------------------------------|-------------------------------|
| Wie viele Kinder haben Sie geboren?                                                                    | <input type="text"/> <input type="text"/>                                             | Bei wie vielen Geburten wurde eine Saugglocke zur Hilfe genommen? | <input type="text"/>               |                               |
| Bei wie vielen Geburten wurde ein Kaiserschnitt gemacht?                                               | <input type="text"/>                                                                  | Bei wie vielen Geburten wurde eine Zange zur Hilfe genommen?      | <input type="text"/>               |                               |
| Wieviel wog Ihr schwerstes Kind bei der Geburt?                                                        | <input type="text"/> <input type="text"/> <input type="text"/> <input type="text"/> g | <input type="checkbox"/> > 4000g                                  |                                    |                               |
| Hatten Sie bei einer Ihrer Geburten Schließmuskel- oder Darmverletzungen (Dammriss 3. oder 4. Grades)? | <input type="checkbox"/> nein                                                         | <input type="checkbox"/> ja                                       |                                    |                               |
| Hatten Sie nach der Geburt Schmerzen im Scheiden-, Damm- oder Darmbereich?                             | <input type="checkbox"/> nein                                                         | <input type="checkbox"/> ja                                       |                                    |                               |
| Haben Sie das Gefühl, die Geburtsschmerzen bzw. die Schmerzen nach der Geburt verarbeitet zu haben?    | <input type="checkbox"/> ja                                                           | <input type="checkbox"/> größtenteils                             | <input type="checkbox"/> ein wenig | <input type="checkbox"/> nein |
| Haben Sie das Gefühl, die Ängste, die Sie unter der Geburt hatten, verarbeitet zu haben?               | <input type="checkbox"/> ja                                                           | <input type="checkbox"/> größtenteils                             | <input type="checkbox"/> ein wenig | <input type="checkbox"/> nein |
